# Supplementary material
Source: PubMed Central journal article supplement (PMC5411596)
Supplement: JVI.02268-16_zjv999182593s1.pdf [file JVI.02268-16_zjv999182593s1.pdf]

# Figure S1

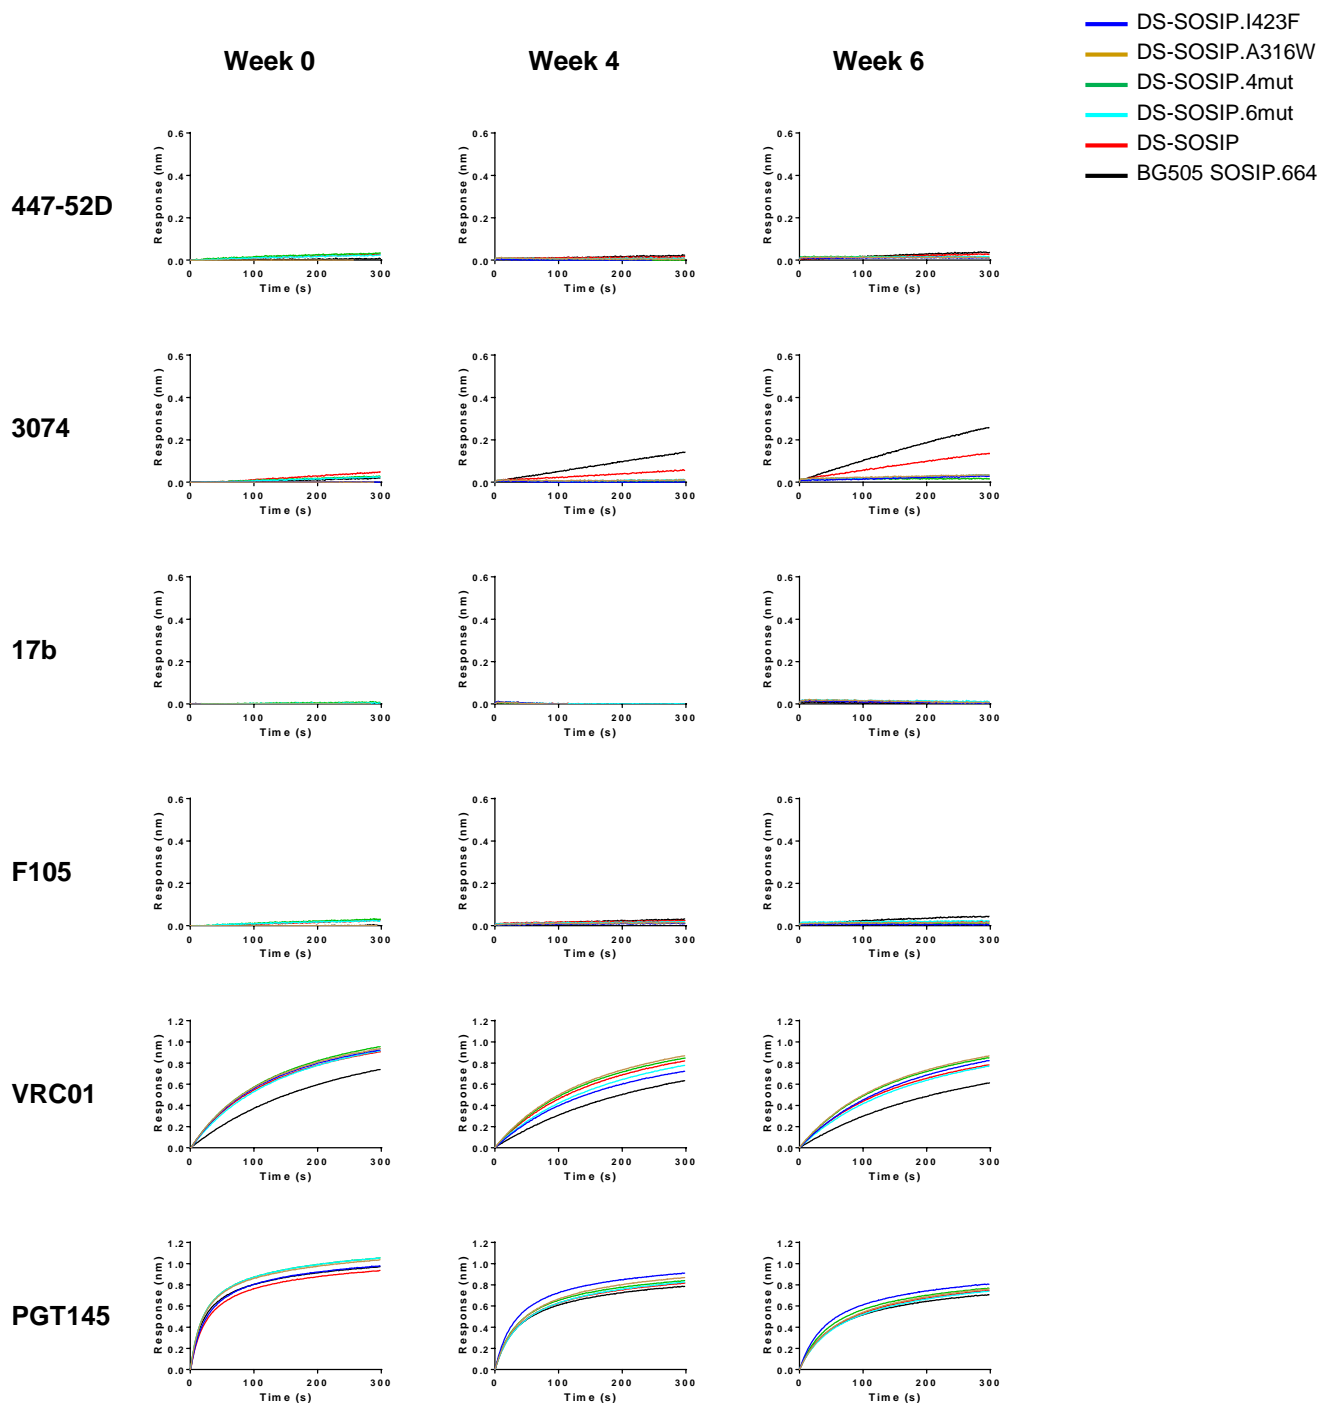

**Figure S1. Protein stability overtime.** Frozen trimer variants were thaw and diluted to 62.5ug/ml with PBS. Their antigenicity as measured by Bio-Layer Interferometry at time of thaw and then after 4 or 6 weeks of incubation at 37° C. Antigenicity was measured against antibodies that recognize open forms of the trimer (e.g. 447-52D, 3074, 17b, F105) and is shown in the top four rows and against antibodies that recognize closed forms of the trimer (e.g. VRC01 and PGT145) and is shown in the bottom two rows.

**Table S1. DS-SOSIP variants selected based on computational structure-based design to stabilize the conformationally flexible region. (A) Clusters of spatially proximal, conformationally flexible residues selected for mutation (B) Mutational combinations generated.**

(A)

| Cluster | Residues         |                  |                        |
|---------|------------------|------------------|------------------------|
|         | V1/V2            | V3               | $\beta$ 20- $\beta$ 21 |
| 1       | V134, L175       | I322, I326       | -                      |
| 2       | V134, N136, M150 | I326             | -                      |
| 3       | L154             | N300, N302, N320 | -                      |
| 4       | V120, L122, Q203 | Y318             | -                      |
| 5       | V120             | I309, Q315       | -                      |
| 6       | E153, Y177       | Q328             | I420                   |
| 7       | I116             | -                | I424, M426, Q432       |

(B)

| Mutations                                 | Cluster(s) |
|-------------------------------------------|------------|
| V134F/L175M/I322M/I326M                   | 1          |
| V134F/I322Y/I326M                         | 1          |
| V134I/L175W/I322F/I326M                   | 1          |
| V134F/N136W/M150H/I326M                   | 2          |
| V134F/N136W/M150F/I326L                   | 2          |
| V134I/N136W/M150F/I326L                   | 2          |
| V134F/N136F/M150L/I326M                   | 2          |
| L154M/N300M/N302M/T320L                   | 3          |
| L154F/N300L/N302M/T320L                   | 3          |
| L154W/N300L/N302G/T320F                   | 3          |
| V120F/Q203M/Y318M                         | 4          |
| V120I/Q203M/Y318W                         | 4          |
| V120W/Q203M/Y318W                         | 4          |
| V120F/Q315M                               | 5          |
| V120W/Q315F                               | 5          |
| Y177W/I420M                               | 6          |
| Y177W/Q328F/I420M                         | 6          |
| L116M/M426F/Q432M                         | 7          |
| L116M/M426F/Q432W                         | 7          |
| M426F/Q432L                               | 7          |
| V134F/L175M/I322M/I326M/N136W/M150H       | 1, 2       |
| V134I/L175W/I322F/I326L/N136W/M150F       | 1, 2       |
| V120F/Q203M/Y318M/Q315M                   | 3, 4       |
| V120W/Q203M/Y318W/Q315F                   | 3, 4       |
| L154M/N300M/N302M/T320L/Y177W/I420M       | 5, 6       |
| L154W/N300L/N302G/T320F/Y177W/Q328F/I420M | 5, 6       |

**Table S2. Antigenicity of BG505 SOSIP.664 variants that showed high reactivity toward quaternary antibodies CAP256-VRC26.09 and PGT145.**

| Mutations         | CAP256-VRC26.09 | PGT145 | F105 | 17b+sCD4 | 17b   | PGT122 | VRC01 | 447-52D | 447-52D+sCD4 | PGT151 |
|-------------------|-----------------|--------|------|----------|-------|--------|-------|---------|--------------|--------|
| 501C/A662C        | (++)            | (+++)  | -    | (+++)    | (+)   | (+++)  | (+++) | (++)    | (+++)        | (+++)  |
| 538C/Q652C        | (++)            | (+++)  | -    | (++)     | -     | (+++)  | (+++) | (+++)   | (+++)        | (++)   |
| N195C/A433C       | (++)            | (+++)  | -    | -        | -     | (+++)  | (+++) | (++)    | (+++)        | (+++)  |
| S199C/A433C       | (+++)           | (+++)  | -    | -        | -     | (+++)  | (+++) | (++)    | (+++)        | (+++)  |
| R304C/Q440C       | (++)            | (+++)  | -    | (+++)    | -     | (+++)  | (+++) | -       | -            | (+++)  |
| F159Y             | (+++)           | (+++)  | -    | (++)     | -     | (+++)  | (+++) | (++)    | (+++)        | (+++)  |
| I323Y             | (+++)           | (+++)  | -    | (+++)    | (+)   | (+++)  | (+++) | (+++)   | (+++)        | (+++)  |
| F159Y/I323Y       | (+++)           | (+++)  | -    | (+++)    | (+)   | (+++)  | (+++) | (++)    | (+++)        | (+++)  |
| L544Y             | (+++)           | (+++)  | -    | (+++)    | -     | (+++)  | (+++) | (++)    | (+++)        | (+++)  |
| F223W             | (++)            | (+++)  | -    | (+)      | -     | (+++)  | (+++) | (++)    | (+++)        | (+++)  |
| L544Y/L537Y       | (+++)           | (+++)  | (+)  | (+++)    | (+)   | (+++)  | (+++) | (+++)   | (+++)        | (+)    |
| L544Y/F223W       | (++)            | (+++)  | -    | (++)     | -     | (+++)  | (+++) | (+++)   | (+++)        | (++)   |
| L544Y/L537Y/F223W | (++)            | (+++)  | -    | (++)     | -     | (+++)  | (+++) | (+++)   | (+++)        | -      |
| V580L             | (+++)           | (+++)  | -    | (+++)    | -     | (+++)  | (+++) | (++)    | (+++)        | (+++)  |
| V583L             | (+++)           | (+++)  | -    | (+++)    | -     | (+++)  | (+++) | (+)     | (+++)        | (+++)  |
| V580L/V583L       | (+++)           | (+++)  | -    | (+++)    | -     | (+++)  | (+++) | (++)    | (+++)        | (+++)  |
| W69P              | (++)            | (+++)  | -    | (+++)    | -     | (+++)  | ND    | (+++)   | (+++)        | (++)   |
| V68P              | (+++)           | (+++)  | -    | (+++)    | -     | (+++)  | ND    | (+++)   | (+++)        | (+++)  |
| T71P              | (+++)           | (+++)  | -    | (+++)    | -     | (+++)  | ND    | (+++)   | (+++)        | (+++)  |
| V75W              | (+++)           | (+++)  | -    | (+++)    | (+)   | (+++)  | ND    | (+++)   | (+++)        | (+++)  |
| V75F              | (+++)           | (+++)  | -    | (+++)    | (+)   | (+++)  | ND    | (+++)   | (+++)        | (+++)  |
| V75M              | (+++)           | (+++)  | -    | (+++)    | (+)   | (+++)  | ND    | (+++)   | (+++)        | (+++)  |
| V208W             | (+++)           | (+++)  | -    | (+++)    | (+)   | (+++)  | ND    | (+++)   | (+++)        | (+++)  |
| V208F             | (+++)           | (+++)  | (+)  | (+++)    | (+)   | (+++)  | ND    | (+++)   | (+++)        | (+++)  |
| A58C/I77C         | (++)            | (+++)  | -    | (+++)    | -     | (++)   | ND    | (+++)   | (+++)        | (+++)  |
| D57C/I77C         | (++)            | (+++)  | -    | (+++)    | (+)   | (+++)  | ND    | (+++)   | (+++)        | (+++)  |
| N67P              | (+++)           | (+++)  | -    | (+++)    | -     | (+++)  | ND    | (+++)   | (+++)        | (+++)  |
| H66P              | (+++)           | (+++)  | -    | (+++)    | -     | (+++)  | ND    | (+++)   | (+++)        | (+++)  |
| N67P/H66P         | (++)            | (+++)  | -    | (+++)    | -     | (+++)  | ND    | (+++)   | (+++)        | (+++)  |
| W112I             | (+++)           | (+++)  | -    | (+++)    | -     | (+++)  | ND    | (+++)   | (+++)        | (+++)  |
| W112M             | (+++)           | (+++)  | -    | (+++)    | -     | (+++)  | ND    | (+++)   | (+++)        | (+++)  |
| W427I             | (++)            | (+++)  | -    | (+)      | -     | (+++)  | ND    | (+++)   | (++)         | (+++)  |
| W427M             | (+++)           | (+++)  | -    | (+++)    | -     | (+++)  | ND    | (+++)   | (+++)        | (+++)  |
| R429N             | (+++)           | (+++)  | -    | (+++)    | (+)   | (+++)  | ND    | (+++)   | (+++)        | (+++)  |
| R429L             | (++)            | (+++)  | -    | (+++)    | -     | (+++)  | ND    | (+++)   | (+++)        | (+++)  |
| R429L/W427M       | (++)            | (+++)  | -    | -        | -     | (+++)  | ND    | (+++)   | (++)         | (+++)  |
| G431G/C/S199C     | (++)            | (++)   | -    | -        | -     | (+++)  | ND    | (+++)   | (+++)        | (++)   |
| V120W             | (+++)           | (+++)  | -    | (+++)    | (++)  | (+++)  | ND    | (+++)   | (+++)        | (+++)  |
| 316W              | (++)            | (+++)  | -    | (+++)    | (+)   | (+++)  | ND    | (+++)   | (+++)        | (+++)  |
| I309W             | (+++)           | (+++)  | -    | (+++)    | (++)  | (+++)  | ND    | (+)     | (++)         | (+++)  |
| S115W             | (+++)           | (+++)  | (+)  | (+++)    | (+)   | (+++)  | ND    | (+++)   | (+++)        | (+++)  |
| P118W             | (++)            | (+++)  | -    | (+++)    | (+)   | (+++)  | ND    | (+++)   | (+++)        | (+++)  |
| Delta_P206        | (+++)           | (+++)  | -    | (++)     | -     | (+++)  | ND    | (+++)   | (+++)        | (+++)  |
| A70Y              | (+++)           | (+++)  | -    | (+++)    | (+)   | (+++)  | ND    | (+++)   | (+++)        | (+++)  |
| A70F              | (+++)           | (+++)  | -    | (+++)    | (+)   | (+++)  | ND    | (+++)   | (+++)        | (+++)  |
| L111Y             | (+++)           | (+++)  | -    | (+++)    | -     | (+++)  | ND    | (+++)   | (+++)        | (+++)  |
| L111F             | (+++)           | (+++)  | -    | (+++)    | (+)   | (+++)  | ND    | (+++)   | (+++)        | (+++)  |
| T202P             | (+++)           | (++)   | (+)  | (+++)    | (+++) | (+++)  | ND    | (+++)   | (+++)        | (+++)  |
| V120T             | (+++)           | (+++)  | -    | (+++)    | (++)  | (+++)  | ND    | (+++)   | (+++)        | (+++)  |
| I573T             | (+++)           | (+++)  | -    | (+++)    | (+)   | (+++)  | ND    | (+++)   | (+++)        | (+++)  |
| G594N             | (+++)           | (+++)  | -    | (+++)    | (+)   | (+++)  | ND    | (+++)   | (+++)        | (+++)  |
| I573T/G594N       | (+++)           | (+++)  | -    | (+++)    | (+)   | (+++)  | ND    | (+++)   | (+++)        | (+++)  |
| I573T/G594N/K574E | (+++)           | (+++)  | -    | (+++)    | (+)   | (+++)  | ND    | (+++)   | (+++)        | (+++)  |
| I573T/G594N/K574T | (+++)           | (+++)  | -    | (+++)    | (+)   | (+++)  | ND    | (+++)   | (+++)        | (+++)  |
| K117W             | (++)            | (++)   | -    | (+++)    | -     | (+++)  | ND    | (+++)   | (+++)        | (+++)  |
| S110W             | (++)            | (++)   | -    | (+++)    | (+)   | (++)   | ND    | (+++)   | (+++)        | (+++)  |

ND: Not determined

**Table S3. ELISA results in 96-well format. SCORE = (CAP256-VRC26.09+PGT145) / ((447-52D+CD4) + (3074+CD4)). Designs selected for large-scale characterization are in bold.**

| Constructs                                       | 17b+CD4     | 3074        | 3074+CD4    | 447-52D     | 447-52D+CD4 | F105        | PGT122      | PGT145      | VRC01       | CAP256-VRC26.09 | SCORE       |
|--------------------------------------------------|-------------|-------------|-------------|-------------|-------------|-------------|-------------|-------------|-------------|-----------------|-------------|
| BG505-SOSIP                                      | 0.11        | 1.21        | 1.26        | 0.32        | 0.58        | 0.22        | 1.34        | 0.65        | 1.46        | 0.62            | 0.70        |
| DS-SOSIP                                         | 0.14        | 1.29        | 1.37        | 0.46        | 0.53        | 0.23        | 1.34        | 0.77        | 1.36        | 0.66            | 0.75        |
| DS-SOSIP mutations                               | 17b+CD4     | 3074        | 3074+CD4    | 447-52D     | 447-52D+CD4 | F105        | PGT122      | PGT145      | VRC01       | CAP256-VRC26.09 | SCORE       |
| <b>L154M/N300M/N302M/T320L</b>                   | <b>0.17</b> | <b>1.38</b> | <b>1.57</b> | <b>0.47</b> | <b>0.40</b> | <b>0.30</b> | <b>1.61</b> | <b>1.22</b> | <b>1.74</b> | <b>1.33</b>     | <b>1.30</b> |
| <b>A316W</b>                                     | <b>0.17</b> | <b>0.99</b> | <b>1.21</b> | <b>0.15</b> | <b>0.24</b> | <b>0.17</b> | <b>1.47</b> | <b>0.97</b> | <b>1.37</b> | <b>0.89</b>     | <b>1.28</b> |
| N302F                                            | 0.17        | 1.30        | 1.41        | 0.36        | 0.62        | 0.14        | 1.62        | 1.21        | 1.63        | 1.29            | 1.23        |
| <b>L154M/N300M/N302M/T320L/Y177W/I420M/I423F</b> | <b>0.16</b> | <b>1.35</b> | <b>1.42</b> | <b>0.21</b> | <b>0.45</b> | <b>0.14</b> | <b>1.37</b> | <b>0.96</b> | <b>1.34</b> | <b>1.10</b>     | <b>1.11</b> |
| L154F/N300L/N302M/T320L                          | 0.14        | 1.31        | 1.51        | 0.25        | 0.40        | 0.31        | 1.42        | 0.91        | 1.47        | 1.07            | 1.04        |
| I309W                                            | 0.15        | 0.51        | 0.94        | 0.06        | 0.09        | 0.17        | 1.15        | 0.67        | 1.18        | 0.36            | 1.00        |
| A204W                                            | 0.15        | 1.41        | 1.62        | 0.40        | 0.70        | 0.14        | 1.60        | 1.12        | 1.56        | 1.11            | 0.96        |
| Q432F                                            | 0.15        | 1.31        | 1.41        | 0.43        | 0.66        | 0.14        | 1.45        | 0.97        | 1.42        | 0.97            | 0.94        |
| I307W                                            | 0.16        | 1.26        | 1.49        | 0.12        | 0.18        | 0.17        | 1.41        | 0.95        | 1.38        | 0.61            | 0.94        |
| I430F                                            | 0.15        | 1.48        | 1.53        | 0.44        | 0.66        | 0.15        | 1.61        | 0.98        | 1.55        | 1.04            | 0.92        |
| R429N                                            | 0.15        | 1.22        | 1.29        | 0.37        | 0.59        | 0.16        | 1.37        | 0.84        | 1.40        | 0.87            | 0.91        |
| F159Y                                            | 0.15        | 1.32        | 1.45        | 0.38        | 0.63        | 0.14        | 1.44        | 0.84        | 1.44        | 1.01            | 0.89        |
| A436W                                            | 0.16        | 1.42        | 1.59        | 0.46        | 0.65        | 0.15        | 1.43        | 0.95        | 1.38        | 0.97            | 0.86        |
| G594N                                            | 0.11        | 1.29        | 1.18        | 0.35        | 0.44        | 0.24        | 1.39        | 0.67        | 1.67        | 0.71            | 0.85        |
| H66P                                             | 0.17        | 1.27        | 1.47        | 0.40        | 0.63        | 0.15        | 1.39        | 0.89        | 1.38        | 0.86            | 0.83        |
| V75M                                             | 0.16        | 1.23        | 1.42        | 0.37        | 0.52        | 0.17        | 1.46        | 0.87        | 1.39        | 0.74            | 0.83        |
| I323Y                                            | 0.15        | 1.36        | 1.62        | 0.41        | 0.62        | 0.15        | 1.39        | 0.94        | 1.46        | 0.88            | 0.81        |
| V120T                                            | 0.11        | 1.35        | 1.36        | 0.88        | 0.46        | 0.29        | 1.39        | 0.66        | 1.67        | 0.81            | 0.81        |
| F159Y/I323Y                                      | 0.16        | 1.36        | 1.50        | 0.42        | 0.65        | 0.15        | 1.38        | 0.82        | 1.35        | 0.88            | 0.79        |
| L544Y/L537Y                                      | 0.11        | 1.34        | 0.76        | 0.83        | 0.51        | 0.21        | 1.18        | 0.51        | 1.42        | 0.50            | 0.79        |
| V172F                                            | 0.15        | 1.38        | 1.64        | 0.38        | 0.64        | 0.16        | 1.33        | 0.83        | 1.29        | 0.94            | 0.78        |
| W427M                                            | 0.15        | 1.26        | 1.35        | 0.29        | 0.40        | 0.14        | 1.17        | 0.70        | 1.13        | 0.65            | 0.77        |
| A70F                                             | 0.17        | 1.31        | 1.54        | 0.46        | 0.57        | 0.16        | 1.40        | 0.85        | 1.37        | 0.77            | 0.77        |
| A204F                                            | 0.15        | 1.46        | 1.71        | 0.45        | 0.78        | 0.15        | 1.44        | 0.89        | 1.46        | 1.01            | 0.77        |
| W112I                                            | 0.17        | 1.20        | 1.27        | 0.42        | 0.46        | 0.18        | 1.28        | 0.67        | 1.17        | 0.64            | 0.76        |
| V583L                                            | 0.15        | 1.27        | 1.50        | 0.37        | 0.59        | 0.15        | 1.41        | 0.84        | 1.37        | 0.74            | 0.76        |
| V208F                                            | 0.14        | 1.33        | 1.54        | 0.40        | 0.67        | 0.14        | 1.39        | 0.88        | 1.38        | 0.78            | 0.75        |
| L111Y                                            | 0.16        | 1.30        | 1.48        | 0.41        | 0.53        | 0.17        | 1.36        | 0.85        | 1.35        | 0.65            | 0.75        |
| I307F                                            | 0.16        | 1.26        | 1.53        | 0.18        | 0.32        | 0.15        | 1.26        | 0.83        | 1.26        | 0.55            | 0.75        |
| T71P                                             | 0.15        | 1.11        | 1.34        | 0.29        | 0.48        | 0.14        | 1.21        | 0.71        | 1.27        | 0.65            | 0.74        |
| V580L                                            | 0.17        | 1.27        | 1.50        | 0.37        | 0.47        | 0.24        | 1.34        | 0.72        | 1.27        | 0.72            | 0.73        |
| V120F/Q315M                                      | 0.14        | 1.27        | 1.43        | 0.21        | 0.32        | 0.14        | 1.03        | 0.61        | 1.05        | 0.66            | 0.72        |
| L154F                                            | 0.14        | 1.40        | 1.60        | 0.43        | 0.60        | 0.14        | 1.30        | 0.84        | 1.35        | 0.74            | 0.72        |
| Y177W/I420M                                      | 0.16        | 1.44        | 1.49        | 0.43        | 0.54        | 0.15        | 1.23        | 0.77        | 1.30        | 0.68            | 0.71        |
| L544Y                                            | 0.11        | 1.25        | 1.14        | 0.57        | 0.54        | 0.24        | 1.35        | 0.60        | 1.54        | 0.60            | 0.71        |
| L111F                                            | 0.17        | 1.23        | 1.36        | 0.42        | 0.48        | 0.20        | 1.46        | 0.74        | 1.37        | 0.57            | 0.71        |
| V208W                                            | 0.15        | 1.35        | 1.52        | 0.44        | 0.58        | 0.16        | 1.37        | 0.84        | 1.29        | 0.65            | 0.71        |
| E164F                                            | 0.15        | 1.37        | 1.51        | 0.37        | 0.58        | 0.13        | 1.26        | 0.70        | 1.22        | 0.77            | 0.70        |
| V75F                                             | 0.16        | 1.35        | 1.52        | 0.43        | 0.57        | 0.15        | 1.23        | 0.79        | 1.31        | 0.63            | 0.68        |
| V68P                                             | 0.15        | 1.38        | 1.52        | 0.42        | 0.65        | 0.14        | 1.35        | 0.78        | 1.35        | 0.69            | 0.68        |
| I430W                                            | 0.14        | 1.46        | 1.51        | 0.41        | 0.61        | 0.14        | 1.23        | 0.74        | 1.21        | 0.67            | 0.67        |
| V580L/V583L                                      | 0.14        | 1.44        | 1.47        | 0.43        | 0.51        | 0.14        | 1.26        | 0.66        | 1.22        | 0.66            | 0.67        |
| Q432W                                            | 0.17        | 1.37        | 1.45        | 0.36        | 0.58        | 0.15        | 1.14        | 0.68        | 1.09        | 0.65            | 0.65        |
| L154W                                            | 0.15        | 1.39        | 1.58        | 0.42        | 0.62        | 0.14        | 1.26        | 0.76        | 1.30        | 0.68            | 0.65        |
| A70Y                                             | 0.15        | 1.10        | 1.38        | 0.34        | 0.50        | 0.15        | 1.20        | 0.69        | 1.17        | 0.53            | 0.65        |
| I573T/G594N                                      | 0.15        | 1.50        | 1.36        | 0.49        | 0.51        | 0.20        | 1.35        | 0.59        | 1.54        | 0.63            | 0.65        |
| T202F                                            | 0.15        | 1.34        | 1.47        | 0.44        | 0.50        | 0.23        | 1.17        | 0.70        | 1.19        | 0.58            | 0.65        |
| R304C/Q440C                                      | 0.15        | 1.43        | 1.59        | 0.07        | 0.09        | 0.13        | 0.89        | 0.57        | 0.96        | 0.50            | 0.64        |
| V75W                                             | 0.16        | 1.39        | 1.51        | 0.41        | 0.57        | 0.15        | 1.18        | 0.69        | 1.14        | 0.61            | 0.62        |
| Q315F                                            | 0.15        | 1.21        | 1.43        | 0.14        | 0.18        | 0.16        | 1.02        | 0.51        | 0.89        | 0.49            | 0.62        |
| F223W                                            | 0.15        | 1.43        | 1.46        | 0.41        | 0.51        | 0.14        | 1.15        | 0.59        | 1.08        | 0.62            | 0.62        |

**Table S3. ELISA results. (Cont.)**

| DS-SOSIP mutations                        | 17b+CD4 | 3074 | 3074+CD4 | 447-52D | 447-52D+CD4 | F105 | PGT122 | PGT145 | VRC01 | CAP256-VRC26.09 | SCORE |
|-------------------------------------------|---------|------|----------|---------|-------------|------|--------|--------|-------|-----------------|-------|
| I573T                                     | 0.15    | 1.41 | 1.52     | 0.43    | 0.54        | 0.14 | 1.07   | 0.59   | 1.07  | 0.62            | 0.61  |
| L544Y                                     | 0.11    | 1.25 | 1.14     | 0.57    | 0.54        | 0.24 | 1.35   | 0.60   | 1.54  | 0.60            | 0.61  |
| R429L                                     | 0.15    | 1.41 | 1.52     | 0.43    | 0.54        | 0.14 | 1.07   | 0.59   | 1.07  | 0.62            | 0.61  |
| I573T/G594N                               | 0.15    | 1.50 | 1.36     | 0.49    | 0.51        | 0.20 | 1.35   | 0.59   | 1.54  | 0.63            | 0.59  |
| F223W                                     | 0.15    | 1.43 | 1.46     | 0.41    | 0.51        | 0.14 | 1.15   | 0.59   | 1.08  | 0.62            | 0.59  |
| A58C/T77C                                 | 0.15    | 1.52 | 1.55     | 0.46    | 0.49        | 0.14 | 1.06   | 0.58   | 1.07  | 0.62            | 0.57  |
| I573T                                     | 0.10    | 1.66 | 1.46     | 0.81    | 0.54        | 0.18 | 1.33   | 0.58   | 1.57  | 0.54            | 0.56  |
| T202W                                     | 0.15    | 1.36 | 1.47     | 0.41    | 0.49        | 0.15 | 0.99   | 0.58   | 1.00  | 0.52            | 0.56  |
| R304C/Q440C                               | 0.15    | 1.43 | 1.59     | 0.07    | 0.09        | 0.13 | 0.89   | 0.57   | 0.96  | 0.50            | 0.56  |
| P118W                                     | 0.15    | 1.37 | 1.53     | 0.45    | 0.53        | 0.15 | 1.03   | 0.56   | 0.97  | 0.50            | 0.55  |
| Delta_P206                                | 0.12    | 1.19 | 1.29     | 0.38    | 0.79        | 0.17 | 1.19   | 0.55   | 1.20  | 0.55            | 0.55  |
| F176W                                     | 0.16    | 1.43 | 1.53     | 0.46    | 0.57        | 0.15 | 1.00   | 0.53   | 0.97  | 0.58            | 0.53  |
| N67P/H66P                                 | 0.16    | 1.35 | 1.50     | 0.41    | 0.56        | 0.16 | 1.02   | 0.52   | 0.94  | 0.36            | 0.53  |
| V120W                                     | 0.17    | 1.11 | 1.38     | 0.34    | 0.42        | 0.29 | 1.06   | 0.52   | 1.00  | 0.47            | 0.53  |
| R429L/W427M                               | 0.17    | 1.32 | 1.42     | 0.36    | 0.52        | 0.15 | 1.01   | 0.51   | 0.96  | 0.55            | 0.52  |
| Q315F                                     | 0.15    | 1.21 | 1.43     | 0.14    | 0.18        | 0.16 | 1.02   | 0.51   | 0.89  | 0.49            | 0.52  |
| L544Y/L537Y                               | 0.11    | 1.34 | 0.76     | 0.83    | 0.51        | 0.21 | 1.18   | 0.51   | 1.42  | 0.50            | 0.50  |
| T538C/Q652C                               | 0.14    | 1.54 | 1.56     | 0.58    | 0.63        | 0.13 | 0.92   | 0.49   | 0.86  | 0.35            | 0.45  |
| W69P                                      | 0.15    | 1.50 | 1.63     | 0.42    | 0.52        | 0.13 | 1.03   | 0.49   | 0.96  | 0.36            | 0.44  |
| V134I/N136W/M150F/I326L                   | 0.15    | 1.58 | 1.59     | 0.53    | 0.56        | 0.15 | 0.79   | 0.42   | 0.83  | 0.34            | 0.43  |
| M426F/Q432L                               | 0.14    | 1.41 | 1.38     | 0.40    | 0.48        | 0.13 | 0.86   | 0.41   | 0.81  | 0.38            | 0.42  |
| Q315W                                     | 0.15    | 1.12 | 1.30     | 0.30    | 0.24        | 0.15 | 0.85   | 0.40   | 0.73  | 0.36            | 0.41  |
| V120W/Q315F                               | 0.15    | 1.26 | 1.30     | 0.19    | 0.20        | 0.19 | 0.82   | 0.40   | 0.75  | 0.27            | 0.39  |
| T198W                                     | 0.16    | 1.38 | 1.50     | 0.54    | 0.55        | 0.24 | 0.99   | 0.40   | 0.99  | 0.37            | 0.39  |
| Y177W/Q328F/I420M                         | 0.14    | 1.37 | 1.45     | 0.25    | 0.35        | 0.14 | 0.74   | 0.38   | 0.70  | 0.31            | 0.38  |
| G431G/C/S199C                             | 0.16    | 1.45 | 1.61     | 0.58    | 0.63        | 0.17 | 0.81   | 0.36   | 0.81  | 0.29            | 0.37  |
| W427I                                     | 0.14    | 1.10 | 1.20     | 0.21    | 0.26        | 0.13 | 0.74   | 0.35   | 0.80  | 0.30            | 0.37  |
| V120W/Q203M/Y318W                         | 0.15    | 1.41 | 1.37     | 0.48    | 0.53        | 0.17 | 0.79   | 0.35   | 0.81  | 0.36            | 0.35  |
| V120I/Q203M/Y318W                         | 0.14    | 1.41 | 1.35     | 0.42    | 0.51        | 0.15 | 0.77   | 0.35   | 0.86  | 0.43            | 0.33  |
| L116M/M426F/Q432M                         | 0.14    | 1.40 | 1.46     | 0.40    | 0.47        | 0.13 | 0.78   | 0.32   | 0.75  | 0.31            | 0.29  |
| E153W                                     | 0.15    | 1.38 | 1.35     | 0.49    | 0.47        | 0.17 | 0.68   | 0.28   | 0.75  | 0.21            | 0.27  |
| L544Y/L537Y/F223W                         | 0.11    | 1.32 | 1.36     | 0.78    | 0.50        | 0.13 | 0.93   | 0.23   | 1.01  | 0.23            | 0.25  |
| L116M/M426F/Q432W                         | 0.15    | 1.44 | 1.45     | 0.44    | 0.47        | 0.13 | 0.58   | 0.23   | 0.51  | 0.20            | 0.25  |
| K117W                                     | 0.12    | 1.23 | 1.13     | 0.36    | 0.30        | 0.14 | 0.85   | 0.20   | 0.98  | 0.16            | 0.24  |
| V120F/Q203M/Y318M/Q315M                   | 0.15    | 1.08 | 1.13     | 0.30    | 0.37        | 0.14 | 0.59   | 0.19   | 0.54  | 0.17            | 0.23  |
| V134F/N136F/M150L/I326M                   | 0.17    | 1.60 | 1.61     | 0.70    | 0.63        | 0.15 | 0.55   | 0.16   | 0.72  | 0.13            | 0.22  |
| S110W                                     | 0.12    | 1.27 | 1.18     | 0.41    | 0.44        | 0.15 | 0.87   | 0.16   | 1.02  | 0.21            | 0.19  |
| E153F                                     | 0.14    | 1.40 | 1.43     | 0.47    | 0.47        | 0.15 | 0.63   | 0.16   | 0.55  | 0.15            | 0.18  |
| V120F/Q203M/Y318M                         | 0.14    | 1.16 | 1.17     | 0.57    | 0.62        | 0.14 | 0.57   | 0.15   | 0.61  | 0.18            | 0.16  |
| L125W/I194W                               | 0.18    | 2.20 | 1.84     | 1.35    | 1.26        | 0.13 | 1.07   | 0.13   | 0.99  | 0.05            | 0.14  |
| L154W/N300L/N302G/T320F                   | 0.14    | 1.41 | 1.38     | 0.24    | 0.25        | 0.13 | 0.50   | 0.13   | 0.46  | 0.17            | 0.13  |
| L544Y/F223W                               | 0.11    | 1.33 | 1.34     | 0.49    | 0.53        | 0.12 | 0.78   | 0.12   | 0.89  | 0.13            | 0.08  |
| V134F/L175M/I322M/I326M/N136W//M150H      | 0.14    | 1.40 | 1.39     | 0.59    | 0.56        | 0.13 | 0.18   | 0.08   | 0.42  | 0.07            | 0.08  |
| L154W/N300L/N302G/T320F/Y177W/Q328F/I420M | 0.14    | 1.40 | 1.31     | 0.11    | 0.13        | 0.13 | 0.15   | 0.06   | 0.01  | 0.06            | 0.07  |
| V134F/N136W/M150F/I326L                   | 0.16    | 1.62 | 1.52     | 0.50    | 0.48        | 0.14 | 0.39   | 0.05   | 0.42  | 0.06            | 0.06  |
| V120W/Q203M/Y318W/Q315F                   | 0.16    | 1.07 | 1.13     | 0.10    | 0.15        | 0.17 | 0.34   | 0.03   | 0.28  | 0.06            | 0.05  |
| V134I/L175W/I322F/I326L/N136W/M150F       | 0.15    | 1.49 | 1.46     | 0.40    | 0.39        | 0.12 | 0.19   | 0.03   | 0.24  | 0.05            | 0.04  |
| V134F/I322Y/I326M                         | 0.14    | 1.60 | 1.48     | 0.60    | 0.57        | 0.14 | 0.25   | 0.03   | 0.50  | 0.06            | 0.04  |
| V134F/N136W/M150H/I326M                   | 0.14    | 1.62 | 1.53     | 0.60    | 0.58        | 0.14 | 0.29   | 0.02   | 0.46  | 0.06            | 0.04  |
| T202P                                     | 0.12    | 1.33 | 1.20     | 0.82    | 0.75        | 0.15 | 0.59   | 0.02   | 0.69  | 0.03            | 0.04  |
| V134F/L175M/I322M/I326M                   | 0.14    | 1.53 | 1.49     | 0.68    | 0.63        | 0.13 | 0.23   | 0.02   | 0.44  | 0.06            | 0.03  |
| V134I/L175W/I322F/I326M                   | 0.14    | 1.62 | 1.51     | 0.58    | 0.53        | 0.13 | 0.20   | 0.01   | 0.39  | 0.05            | 0.03  |

**Table S4. Data collection and refinement statistics.**

|                                                     | BG505 DS-SOSIP.4mut<br>with PGT122 and 35O22 Fabs                                                    | BG505 DS-SOSIP.6mut<br>with PGT122 and 35O22 Fabs                                                                                             |
|-----------------------------------------------------|------------------------------------------------------------------------------------------------------|-----------------------------------------------------------------------------------------------------------------------------------------------|
| <b>Data collection</b>                              |                                                                                                      |                                                                                                                                               |
| Space group                                         | P6 <sub>3</sub>                                                                                      | P6 <sub>3</sub>                                                                                                                               |
| Cell dimensions                                     |                                                                                                      |                                                                                                                                               |
| <i>a</i> , <i>b</i> , <i>c</i> (Å)                  | 131.45, 131.45, 312.35                                                                               | 128.38, 128.38, 313.13                                                                                                                        |
| $\alpha$ , $\beta$ , $\gamma$ (°)                   | 90.0, 90.0, 120.0                                                                                    | 90.0, 90.0, 120.0                                                                                                                             |
| Resolution (Å)                                      | 50-4.10 <sup>*</sup> ; 50- 3.40 (4.28-4.03, 4.03-3.83, 3.83-3.66, 3.66-3.52, 3.52-3.40) <sup>†</sup> | 50-4.30 <sup>*</sup> ; 50-3.50 (4.41-4.27, 4.27-4.15, 4.15-4.04, 4.04-3.94, 3.94-3.85, 3.85-3.77, 3.77-3.69, 3.69-3.63, 3.63-3.56, 3.56-3.50) |
| <i>R</i> <sub>sym</sub>                             | 0.129 <sup>*</sup> (0.521 <sup>*</sup> ); 0.149 (0.555, 1.014, 1.248, 1.149, 1.136)                  | 0.078 <sup>*</sup> (0.270 <sup>*</sup> ); 0.145 (0.379, 0.554, 0.705, 0.856, 0.811, 1.095, 1.055, 1.027, 1.197, 1.562)                        |
| CC <sub>1/2</sub>                                   | (0.968 <sup>*</sup> ); (0.962, 0.746, 0.567, 0.650, 0.345)                                           | (0.891 <sup>*</sup> ); (0.893, 0.867, 0.680, 0.602, 0.533, 0.397, 0.313, 0.312, 0.347, 0.299)                                                 |
| <i>I</i> / $\sigma$ <i>I</i>                        | 14.91 <sup>*</sup> (2.94 <sup>*</sup> ); 12.0 (1.97, 1.00, 0.67, 0.54, 1.62)                         | 7.6 <sup>*</sup> (2.1 <sup>*</sup> ); 4.3 (2.1, 1.1, 0.8, 0.6, 0.8, 0.4, 0.4, 0.5, 0.3, 0.5)                                                  |
| Completeness (%)                                    | 84.0 <sup>*</sup> (50.8 <sup>*</sup> ); 61.0 (50.0, 41.3, 33.9, 25.1, 17.4)                          | 74.5 <sup>*</sup> (54.8 <sup>*</sup> ); 63.2 (54.9, 55.1, 52.1, 52.7, 54.3, 51.4, 49.3, 48.6, 44.4, 40.9)                                     |
| Redundancy                                          | 8.6 <sup>*</sup> (6.5 <sup>*</sup> ); 7.8 (6.5, 5.8, 4.9, 3.9, 2.5)                                  | 2.6 <sup>*</sup> (2.1 <sup>*</sup> ); 2.3 (2.1, 2.0, 1.9, 1.8, 1.7, 1.7, 1.6, 1.5, 1.5, 1.4)                                                  |
| <b>Refinement</b>                                   |                                                                                                      |                                                                                                                                               |
| Resolution (Å)                                      | 41.48 - 3.41 (3.91-3.71, 3.71-3.55, 3.55-3.41)                                                       | 38.98 - 3.50 (4.64-4.22, 4.22-3.92, 3.92-3.69, 3.69-3.50)                                                                                     |
| No. unique reflections                              | 25638                                                                                                | 18609                                                                                                                                         |
| <i>R</i> <sub>work</sub> / <i>R</i> <sub>free</sub> | 0.2412/0.2882 (0.3186/0.3554, 0.3359/0.4268, 0.3431/0.4536)                                          | 0.2155/0.2989 (0.2377/0.3656, 0.602/0.3321, 0.2938/0.357, 0.2795/0.4043)                                                                      |
| No. atoms                                           | 12029                                                                                                | 11964                                                                                                                                         |
| Protein                                             | 11294                                                                                                | 11210                                                                                                                                         |
| Ligand (glycans)                                    | 735                                                                                                  | 754                                                                                                                                           |
| B-factors (Å <sup>2</sup> )                         | 106                                                                                                  | 113                                                                                                                                           |
| Protein                                             | 105                                                                                                  | 113                                                                                                                                           |
| Ligand (glycans)                                    | 132                                                                                                  | 114                                                                                                                                           |
| R.m.s deviations                                    |                                                                                                      |                                                                                                                                               |
| Bond lengths (Å)                                    | 0.004                                                                                                | 0.004                                                                                                                                         |
| Bond angles (°)                                     | 0.861                                                                                                | 0.676                                                                                                                                         |
| Ramachadran Favored %                               | 92.95                                                                                                | 89.88                                                                                                                                         |
| Ramachadran Allowed %                               | 99.31                                                                                                | 99.16                                                                                                                                         |
| MolProbity all-atoms<br>clashscore                  | 13.98                                                                                                | 8.28                                                                                                                                          |
| MolProbity score                                    | 2.9                                                                                                  | 2.36                                                                                                                                          |
| <b>Overall resolution (Å)<sup>‡</sup></b>           | 4.1                                                                                                  | 4.3                                                                                                                                           |
| <b>PDB ID</b>                                       | 5UTY                                                                                                 | 5UTF                                                                                                                                          |

<sup>\*</sup> Data processing statistics based on the overall resolution cutoff determined as: completeness greater than 50% and *I*/ $\sigma$ *I* greater than 2, as mentioned in the Methods.

<sup>†</sup> Statistics for the highest-resolution shell are shown in parentheses.

<sup>‡</sup> Overall resolution determined as: completeness greater than 50% and *I*/ $\sigma$ *I* greater than 2, as mentioned in the Methods.

Table S5. Neutralization of sera from guinea pigs immunized with different DS-SOSIP variants.

serum/plasma dilutions  
>100,000  
10,000-100,000  
1,000-10,000  
100-1,000  
10-100

| ID50            | Sample    | 8G595.W6M.C2.T323N.5G3 |        |        | Q23.17.5G3 |      |      | Q842.412.5G3 |      |      | Q168.a2.5G3 |      |      | Q461.e2.5G3 |      |      | D3263.B.5G3 |      |      | JRC5F.JB.5G3 |      |      | SF162.L5.5G3 |       |        | TRO.11.5G3 |      |      | CAP256.206.C9.5G3 |      |      | DU156.12.5G3 |      |      | DU422.01.5G3 |       |        | HW965.26.5G3 |      |      | ZM109.4.5G3 |      |       | ZM233.6.5G3 |      |      | SIVmac251.30.5G3 |  |  |
|-----------------|-----------|------------------------|--------|--------|------------|------|------|--------------|------|------|-------------|------|------|-------------|------|------|-------------|------|------|--------------|------|------|--------------|-------|--------|------------|------|------|-------------------|------|------|--------------|------|------|--------------|-------|--------|--------------|------|------|-------------|------|-------|-------------|------|------|------------------|--|--|
|                 |           | Tier 2                 |        |        | Tier 2     |      |      | Tier 2       |      |      | Tier 2      |      |      | Tier 2      |      |      | Tier 1      |      |      | Tier 2       |      |      | Tier 2       |       |        | Tier 2     |      |      | Tier 2            |      |      | Tier 1       |      |      | Tier 2       |       |        | Tier 2       |      |      | non HIV     |      |       |             |      |      |                  |  |  |
|                 |           | Wk6                    | Wk18   | Wk30   | Wk6        | Wk18 | Wk30 | Wk6          | Wk18 | Wk30 | Wk6         | Wk18 | Wk30 | Wk6         | Wk18 | Wk30 | Wk6         | Wk18 | Wk30 | Wk6          | Wk18 | Wk30 | Wk6          | Wk18  | Wk30   | Wk6        | Wk18 | Wk30 | Wk6               | Wk18 | Wk30 | Wk6          | Wk18 | Wk30 | Wk6          | Wk18  | Wk30   | Wk6          | Wk18 | Wk30 | Wk6         | Wk18 | Wk30  | Wk6         | Wk18 | Wk30 |                  |  |  |
| BG595 SOSIP.664 | CGP 605-1 | <10                    | 903    | 2,451  | <10        | <10  | <10  | <10          | <10  | <10  | <10         | <10  | <10  | <10         | <10  | <10  | <10         | 125  | 421  | <10          | <10  | <10  | <10          | 29    | 370    | <10        | <10  | <10  | <10               | <10  | <10  | <10          | <10  | <10  | 18           | 1,212 | 4,754  | <10          | <10  | <10  | <10         | <10  | <10   | <10         | <10  | <10  |                  |  |  |
|                 | CGP 605-2 | <10                    | 10     | 190    | <10        | <10  | <10  | <10          | <10  | <10  | <10         | <10  | <10  | <10         | <10  | <10  | <10         | <10  | <10  | <10          | <10  | <10  | <10          | <10   | <10    | <10        | <10  | <10  | <10               | <10  | <10  | <10          | <10  | <10  | <10          | <10   | <10    | <10          | <10  | <10  | <10         | <10  | <10   | <10         | <10  | <10  |                  |  |  |
|                 | CGP 605-3 | <10                    | 359    | 204    | <10        | <10  | <10  | <10          | <10  | <10  | <10         | <10  | <10  | <10         | <10  | <10  | <10         | <10  | <10  | <10          | <10  | <10  | <10          | <10   | <10    | <10        | <10  | <10  | <10               | <10  | <10  | <10          | <10  | <10  | <10          | <10   | <10    | <10          | <10  | <10  | <10         | <10  | <10   | <10         | <10  | <10  |                  |  |  |
|                 | CGP 605-4 | <10                    | 58     | 2,055  | <10        | <10  | <10  | <10          | <10  | <10  | <10         | <10  | <10  | <10         | <10  | <10  | <10         | <10  | <10  | <10          | <10  | <10  | <10          | <10   | <10    | <10        | <10  | <10  | <10               | <10  | <10  | <10          | <10  | <10  | <10          | <10   | <10    | <10          | <10  | <10  | <10         | <10  | <10   | <10         | <10  | <10  |                  |  |  |
|                 | CGP 605-5 | <10                    | 3,914  | 13,668 | <10        | <10  | <10  | <10          | <10  | <10  | <10         | <10  | <10  | <10         | <10  | <10  | <10         | <10  | <10  | <10          | <10  | <10  | <10          | <10   | <10    | <10        | <10  | <10  | <10               | <10  | <10  | <10          | <10  | <10  | <10          | <10   | <10    | <10          | <10  | <10  | <10         | <10  | <10   | <10         | <10  | <10  |                  |  |  |
| DS-SOSIP        | CGP 606-1 | <10                    | 3,686  | 2,885  | <10        | <10  | <10  | <10          | <10  | <10  | <10         | <10  | <10  | <10         | <10  | <10  | <10         | 54   | 33   | <10          | <10  | <10  | <10          | 34    | 104    | <10        | <10  | <10  | <10               | <10  | <10  | <10          | <10  | <10  | <10          | 1,319 | 1,776  | <10          | <10  | <10  | <10         | <10  | <10   | <10         | <10  | <10  |                  |  |  |
|                 | CGP 606-2 | <10                    | 1,192  | 2,168  | <10        | <10  | <10  | <10          | <10  | <10  | <10         | <10  | <10  | <10         | <10  | <10  | <10         | 53   | 75   | <10          | <10  | <10  | <10          | 1,325 | 2,683  | <10        | <10  | <10  | <10               | <10  | <10  | <10          | <10  | <10  | <10          | 29    | 10,187 | 18,750       | <10  | <10  | <10         | <10  | <10   | <10         | <10  | <10  | <10              |  |  |
|                 | CGP 606-3 | <10                    | 19,903 | 58,779 | <10        | <10  | <10  | <10          | <10  | <10  | <10         | <10  | <10  | <10         | <10  | <10  | <10         | 139  | 82   | <10          | <10  | <10  | <10          | 6,138 | 17,031 | <10        | <10  | <10  | <10               | <10  | <10  | <10          | <10  | <10  | <10          | 49    | 39     | 45           | <10  | <10  | <10         | <10  | <10   | <10         | <10  | <10  | <10              |  |  |
|                 | CGP 606-4 | <10                    | 3,316  | 2,502  | <10        | <10  | <10  | <10          | <10  | <10  | <10         | <10  | <10  | <10         | <10  | <10  | <10         | 703  | 948  | <10          | <10  | <10  | <10          | 3,066 | 3,072  | <10        | <10  | <10  | <10               | <10  | <10  | <10          | <10  | <10  | <10          | 109   | 14,386 | 17,618       | <10  | <10  | <10         | <10  | <10   | <10         | <10  | <10  | <10              |  |  |
|                 | CGP 606-5 | <10                    | 575    | 1,136  | <10        | <10  | <10  | <10          | <10  | <10  | <10         | <10  | <10  | <10         | <10  | <10  | <10         | <10  | <10  | <10          | <10  | <10  | <10          | 175   | 164    | <10        | <10  | <10  | <10               | <10  | <10  | <10          | <10  | <10  | <10          | 46    | 1,091  | 1,992        | <10  | <10  | <10         | <10  | <10   | <10         | <10  | <10  | <10              |  |  |
| DS-SOSIP A316W  | CGP 607-1 | <10                    | 9,416  | 25,782 | <10        | <10  | <10  | <10          | <10  | <10  | <10         | <10  | <10  | <10         | <10  | <10  | <10         | 171  | 75   | <10          | <10  | <10  | <10          | 289   | 279    | <10        | <10  | <10  | <10               | <10  | <10  | <10          | <10  | <10  | <10          | 1,889 | 1,758  | <10          | <10  | <10  | <10         | <10  | <10   | <10         | <10  | <10  |                  |  |  |
|                 | CGP 607-2 | <10                    | 1,104  | 1,465  | <10        | <10  | <10  | <10          | <10  | <10  | <10         | <10  | <10  | <10         | <10  | <10  | <10         | 80   | 60   | <10          | <10  | <10  | <10          | 12    | <10    | <10        | <10  | <10  | <10               | <10  | <10  | <10          | <10  | <10  | <10          | 26    | 1,686  | 1,581        | <10  | <10  | <10         | <10  | <10   | <10         |      |      |                  |  |  |
|                 | CGP 607-3 | <10                    | 1,493  | 7,512  | <10        | <10  | <10  | <10          | <10  | <10  | <10         | <10  | <10  | <10         | <10  | <10  | <10         | 123  | 43   | <10          | <10  | <10  | <10          | <10   | <10    | <10        | <10  | <10  | <10               | <10  | <10  | <10          | <10  | <10  | <10          | 120   | 1,553  | 1,162        | <10  | <10  | <10         | <10  | <10   | <10         |      |      |                  |  |  |
|                 | CGP 607-4 | <10                    | 900    | 2,747  | <10        | <10  | <10  | <10          | <10  | <10  | <10         | <10  | <10  | <10         | <10  | <10  | <10         | 48   | 627  | <10          | <10  | <10  | <10          | <10   | <10    | <10        | <10  | <10  | <10               | <10  | <10  | <10          | <10  | <10  | <10          | 197   | 415    | 308          | <10  | <10  | <10         | <10  | <10   | <10         |      |      |                  |  |  |
|                 | CGP 607-5 | <10                    | 385    | 449    | <10        | <10  | <10  | <10          | <10  | <10  | <10         | <10  | <10  | <10         | <10  | <10  | <10         | 161  | 689  | <10          | <10  | <10  | <10          | 49    | 927    | <10        | <10  | <10  | <10               | <10  | <10  | <10          | <10  | <10  | <10          | 104   | 2,076  | 3,099        | <10  | <10  | <10         | <10  | <10   | <10         |      |      |                  |  |  |
| DS-SOSIP 1423F  | CGP 608-1 | <10                    | 68     | 379    | <10        | <10  | <10  | <10          | <10  | <10  | <10         | <10  | <10  | <10         | <10  | <10  | <10         | 32   | 39   | <10          | <10  | <10  | <10          | 53    | 95     | <10        | <10  | <10  | <10               | <10  | <10  | <10          | <10  | <10  | <10          | 43    | 811    | 1,124        | <10  | <10  | <10         | <10  | <10   | <10         |      |      |                  |  |  |
|                 | CGP 608-2 | <10                    | 1,211  | 4,079  | <10        | <10  | <10  | <10          | <10  | <10  | <10         | <10  | <10  | <10         | <10  | <10  | <10         | 12   | 32   | <10          | <10  | <10  | <10          | 52    | 11     | <10        | <10  | <10  | <10               | <10  | <10  | <10          | <10  | <10  | <10          | 276   | 220    | 493          | <10  | <10  | <10         | <10  | <10   | <10         |      |      |                  |  |  |
|                 | CGP 608-3 | <10                    | 413    | 1,337  | <10        | <10  | <10  | <10          | <10  | <10  | <10         | <10  | <10  | <10         | <10  | <10  | <10         | 26   | 37   | <10          | <10  | <10  | <10          | 125   | 145    | <10        | <10  | <10  | <10               | <10  | <10  | <10          | <10  | <10  | <10          | <10   | <10    | <10          | <10  | <10  | <10         | <10  | <10   |             |      |      |                  |  |  |
|                 | CGP 608-4 | <10                    | 10,205 | 45,665 | <10        | <10  | <10  | <10          | <10  | <10  | <10         | <10  | <10  | <10         | <10  | <10  | <10         | 132  | 53   | <10          | <10  | <10  | <10          | 165   | 247    | <10        | <10  | <10  | <10               | <10  | <10  | <10          | <10  | <10  | <10          | 38    | 1,752  | 1,788        | <10  | <10  | <10         | <10  | <10   | <10         |      |      |                  |  |  |
|                 | CGP 608-5 | <10                    | 17,282 | 36,331 | <10        | <10  | <10  | <10          | <10  | <10  | <10         | <10  | <10  | <10         | <10  | <10  | <10         | 10   | 34   | <10          | <10  | <10  | <10          | 73    | 700    | <10        | <10  | <10  | <10               | <10  | <10  | <10          | <10  | <10  | <10          | 84    | 184    | 957          | <10  | <10  | <10         | <10  | <10   | <10         |      |      |                  |  |  |
| DS-SOSIP 6mut   | CGP 609-1 | <10                    | 454    | 1,458  | <10        | <10  | <10  | <10          | <10  | <10  | <10         | <10  | <10  | <10         | <10  | <10  | <10         | 171  | 80   | <10          | <10  | <10  | <10          | 450   | 1,184  | <10        | <10  | <10  | <10               | <10  | <10  | <10          | <10  | <10  | <10          | 143   | 2,859  | 4,441        | <10  | <10  | <10         | <10  | <10   | <10         |      |      |                  |  |  |
|                 | CGP 609-2 | <10                    | 750    | 2,486  | <10        | <10  | <10  | <10          | <10  | <10  | <10         | <10  | <10  | <10         | <10  | <10  | <10         | <10  | <10  | <10          | <10  | <10  | <10          | 24    | 45     | <10        | <10  | <10  | <10               | <10  | <10  | <10          | <10  | <10  | <10          | 28    | 55     | 181          | <10  | <10  | <10         | <10  | <10   | <10         |      |      |                  |  |  |
|                 | CGP 609-3 | <10                    | 511    | 93,640 | 128,682    | <10  | <10  | <10          | <10  | <10  | <10         | <10  | <10  | <10         | <10  | <10  | <10         | <10  | 14   | 42           | <10  | <10  | <10          | <10   | <10    | <10        | <10  | <10  | <10               | <10  | <10  | <10          | <10  | <10  | <10          | <10   | <10    | <10          | <10  | <10  | <10         | <10  | <10   | <10         |      |      |                  |  |  |
|                 | CGP 609-4 | <10                    | 12,444 | 36,692 | <10        | <10  | <10  | <10          | <10  | <10  | <10         | <10  | <10  | <10         | <10  | <10  | <10         | 182  | 154  | <10          | <10  | <10  | <10          | <10   | <10    | <10        | <10  | <10  | <10               | <10  | <10  | <10          | <10  | <10  | <10          | <10   | <10    | <10          | <10  | <10  | <10         | <10  | <10   |             |      |      |                  |  |  |
|                 | CGP 609-5 | <10                    | 10,440 | 18,741 | <10        | <10  | <10  | <10          | <10  | <10  | <10         | <10  | <10  | <10         | <10  | <10  | <10         | 16   | 24   | <10          | <10  | <10  | <10          | 81    | 264    | <10        | <10  | <10  | <10               | <10  | <10  | <10          | <10  | <10  | <10          | 159   | 465    | 542          | <10  | <10  | <10         | <10  | <10   | <10         |      |      |                  |  |  |
| DS-SOSIP 6mut   | CGP 610-1 | <10                    | 492    | 2,747  | <10        | <10  | <10  | <10          | <10  | <10  | <10         | <10  | <10  | <10         | <10  | <10  | <10         | 28   | 10   | <10          | <10  | <10  | <10          | <10   | <10    | <10        | <10  | <10  | <10               | <10  | <10  | <10          | <10  | <10  | <10          | 29    | 66     | 126          | <10  | <10  | <10         | <10  | <10</ |             |      |      |                  |  |  |
